# Supplementary material
Source: MDPI journal article supplement (https://www.mdpi.com/2071-1050/14/18/11302)
Supplement: s1 [file s1 › sustainability-1685869-supplementary.pdf]

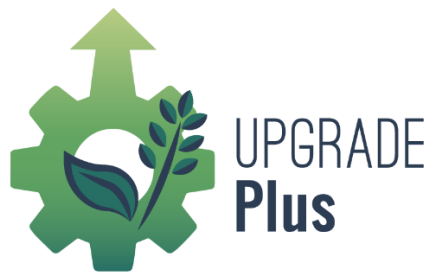

Podcast made by the three Kpachi women's groups for a Tamale radio station, Zaa FM 99.3, that aired on the 2nd and 3rd of April, 2022.

[https://youtu.be/4Tcf\\_VBmQy0](https://youtu.be/4Tcf_VBmQy0)

With support from

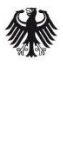

Federal Ministry  
of Food  
and Agriculture

by decision of the  
German Bundestag

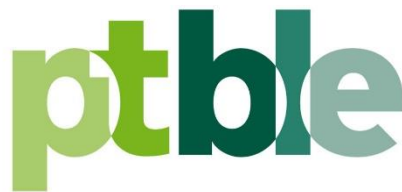

Projektträger Bundesanstalt  
für Landwirtschaft und Ernährung
